# Supplementary material for: Association Between Tumor Mutation Burden (TMB) and Outcomes of Cancer Patients Treated With PD-1/PD-L1 Inhibitions: A Meta-Analysis
Source: PubMed Central journal article supplement (PMC6587434; doi:10.3389/fphar.2019.00673), 2019-06-14
Supplement: DataSheet_1.pdf [file DataSheet_1.pdf]

## *Supplementary Material*

### **1 Supplementary Tables**

Supplementary Table 1. The Cochrane collaboration's tool for assessing risk of bias of the included studies.

| Study                     | Random sequence generation | Allocation concealment | Blinding of participants and personnel | Blinding of outcome assessment | Incomplete outcome data | Selective reporting | Other bias |
|---------------------------|----------------------------|------------------------|----------------------------------------|--------------------------------|-------------------------|---------------------|------------|
| Carbone D P et al.(2017)  | Low                        | Low                    | High                                   | Low                            | Low                     | Low                 | Low        |
| Powles T et al.(2017)     | Low                        | Low                    | High                                   | Low                            | Low                     | Low                 | Low        |
| Hellmann M D et al.(2018) | Low                        | Low                    | High                                   | Low                            | Low                     | Low                 | Low        |

Supplementary Table 2. The Newcastle-Ottawa Scale (NOS) assessment for risk of bias of the included studies.

| Study                    | Selection | Comparability | Outcome | Total score* |
|--------------------------|-----------|---------------|---------|--------------|
| Rizvi N A et al.(2015)   | 2         | 1             | 1       | 4            |
| Kowanetz M et al.(2017)  | 3         | 1             | 2       | 6            |
| Goodman A M et al.(2017) | 3         | 1             | 3       | 7            |
| Hellmann M D al.(2018)   | 3         | 1             | 3       | 7            |

\*NOS points : 0 to 3 : very high risk of bias; 4 to 6: high risk of bias; 7 to 9: low risk of bias.

Supplementary Table 3. Methodological index for non-randomized studies for risk of bias.

| Items                                                   | Score* |
|---------------------------------------------------------|--------|
| 1. A clearly stated aim                                 | 2      |
| 2. Inclusion of consecutive patients                    | 2      |
| 3. Prospective collection of data                       | 2      |
| 4. Endpoints appropriate to the aim of the study        | 2      |
| 5. Unbiased assessment of the study endpoint            | 0      |
| 6. Follow-up period appropriate to the aim of the study | 2      |
| 7. Loss to follow up less than 5%                       | 1      |
| 8. Prospective calculation of the study size            | 2      |

\*This method assessed risk of bias of CheckMate 817. The items are scored 0 (not reported), 1 (reported but inadequate) or 2 (reported and adequate).

2 Supplementary Figures

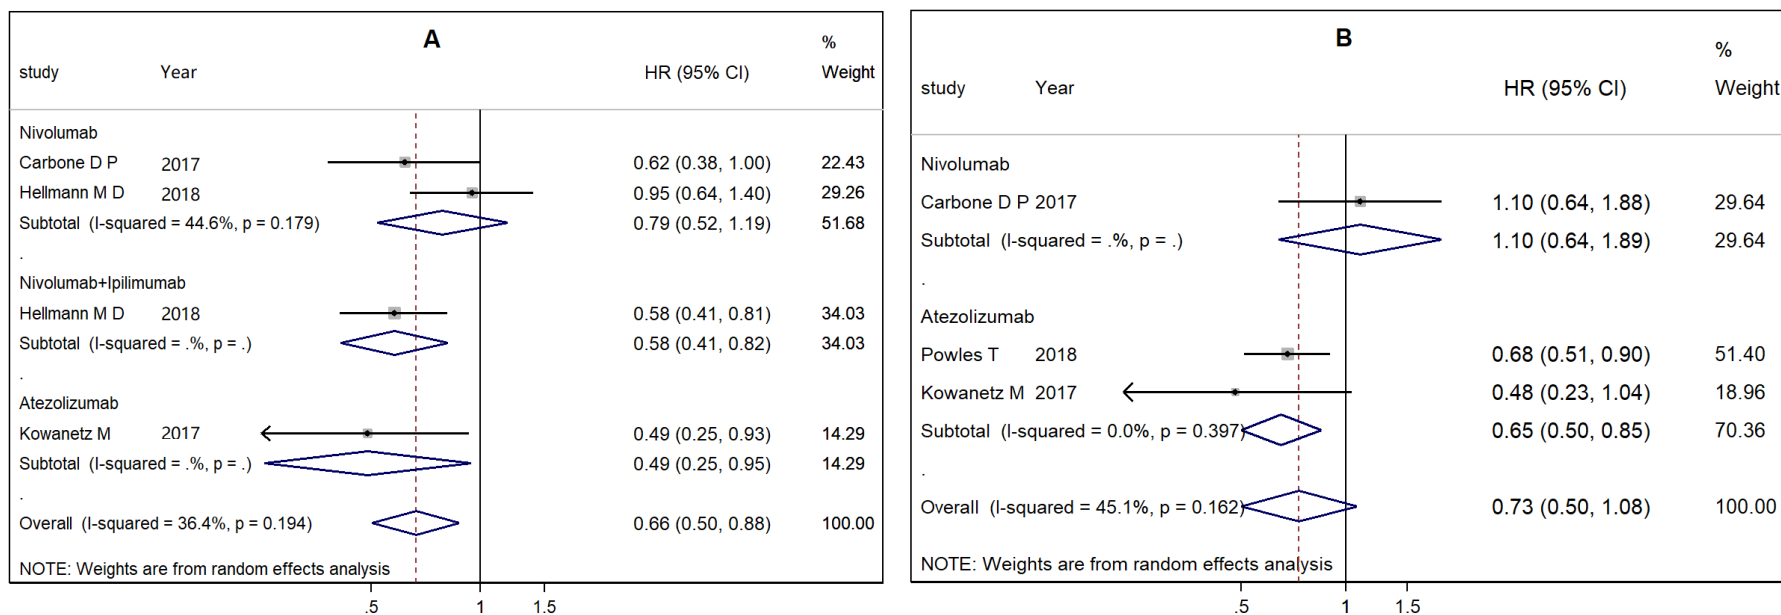

Supplementary Figure 1. Subgroup analysis for (A) PFS; (B) OS in patients with high TMB assigned to treat with immunotherapy versus chemotherapy. HR: Hazard Ratio.

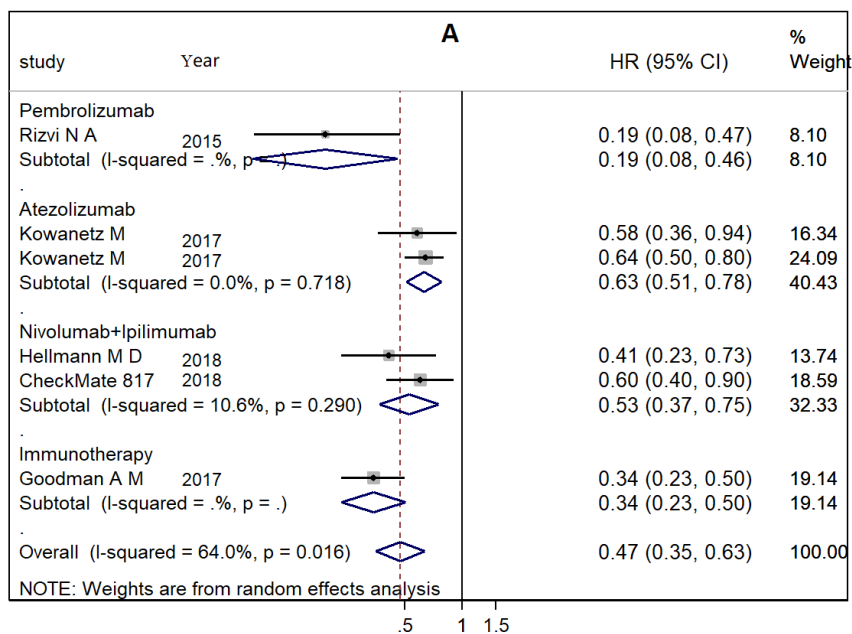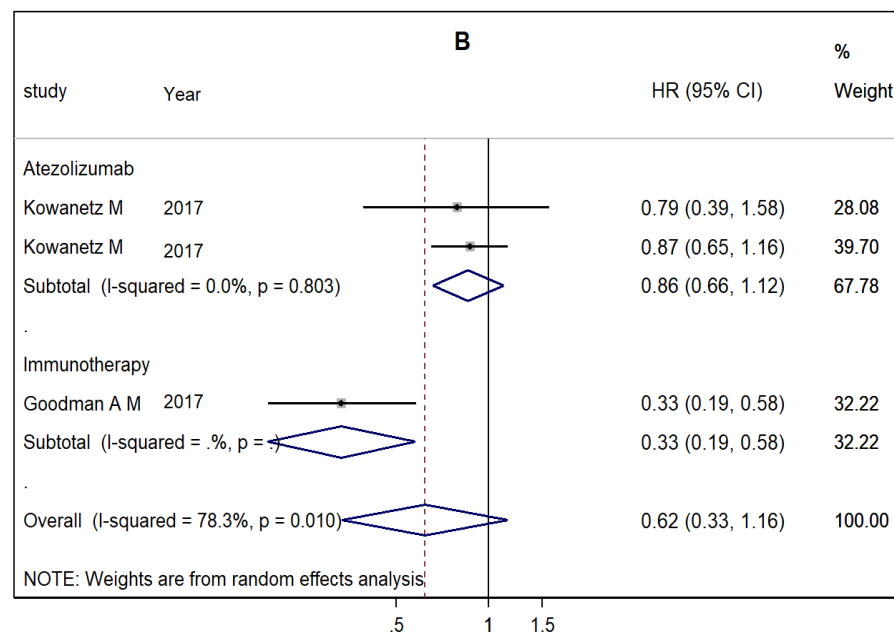

Supplementary Figure 2. Subgroup analysis for (A) PFS; (B) OS in patients with high TMB versus patients with low TMB. HR: Hazard Ratio.

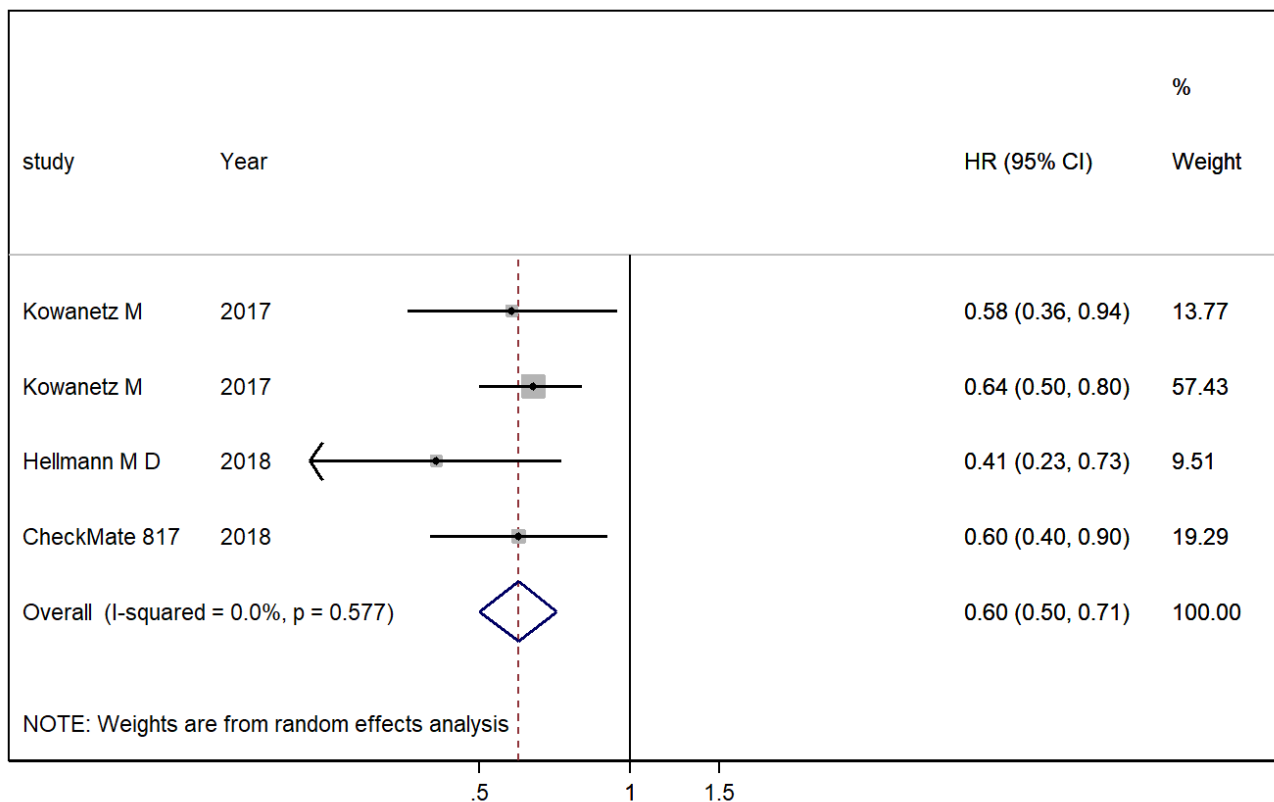

Supplementary Figure 3. Sensitivity analysis for PFS in patients with high TMB versus patients with low TMB. HR: Hazard Ratio.

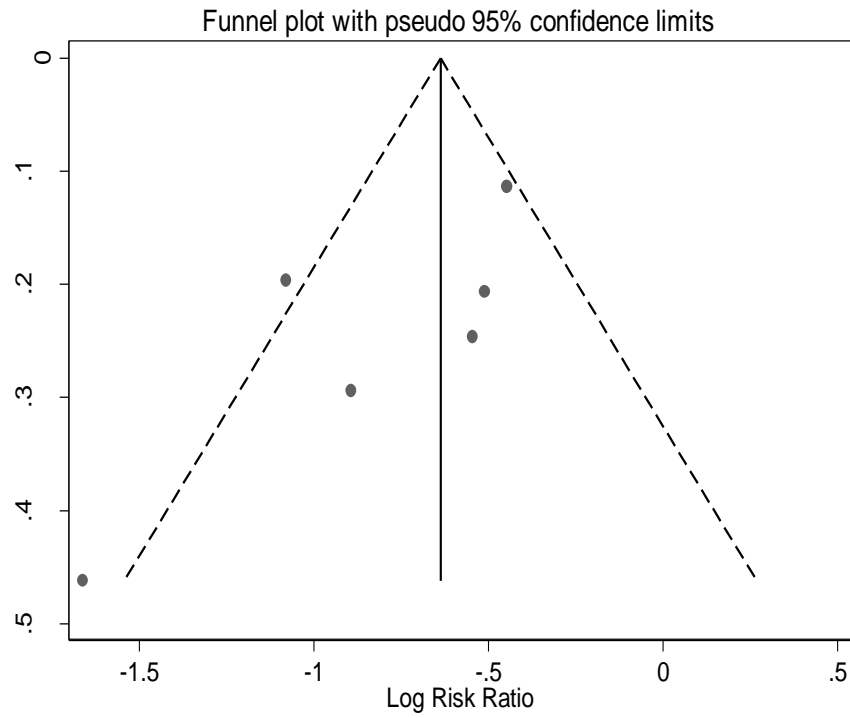

A

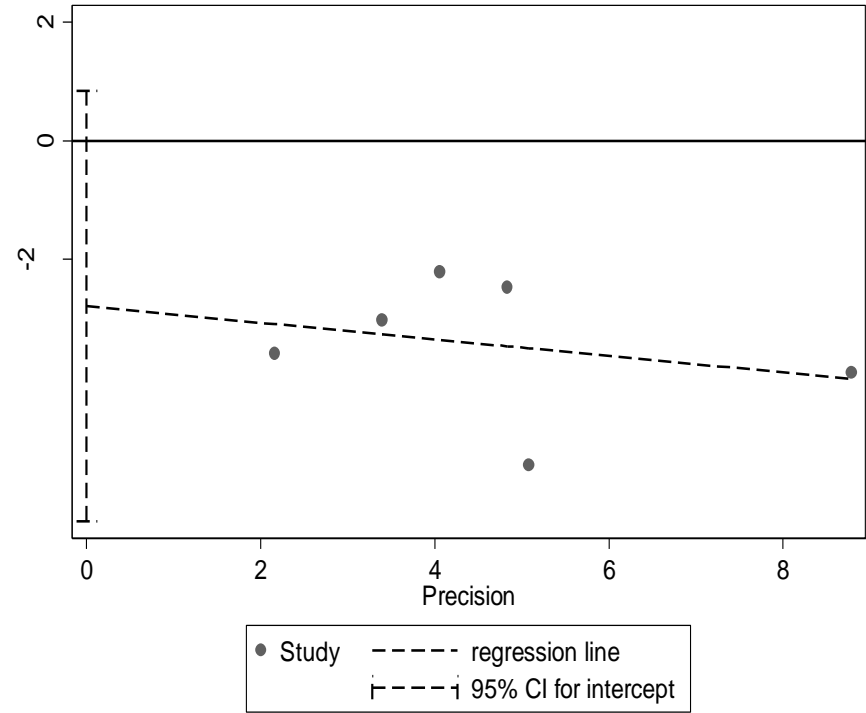

B

Supplementary Figure 4. Funnel plot (A), and Egger plot (B) for publication bias for PFS in patients with high TMB versus patients with low TMB.

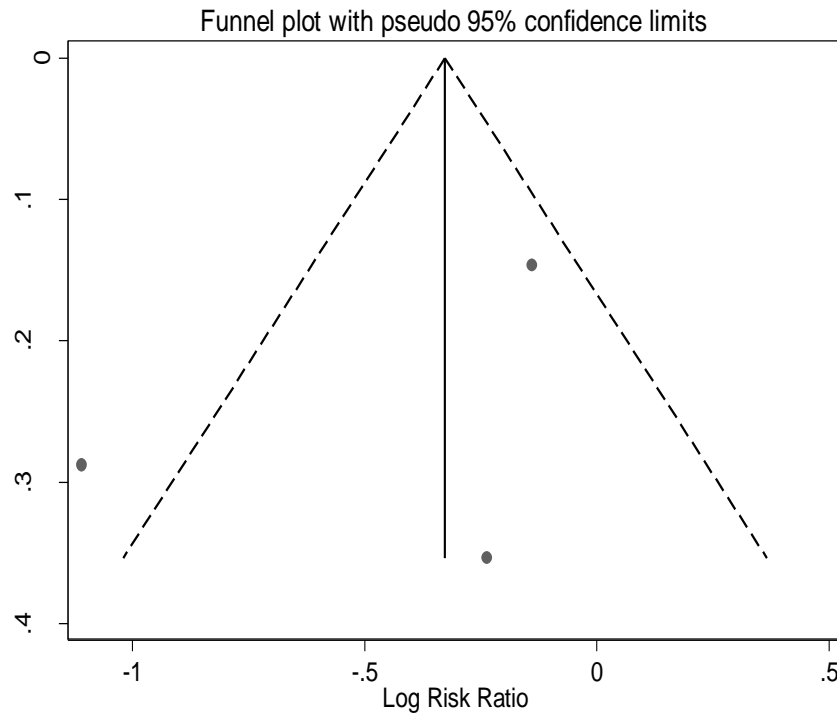

A

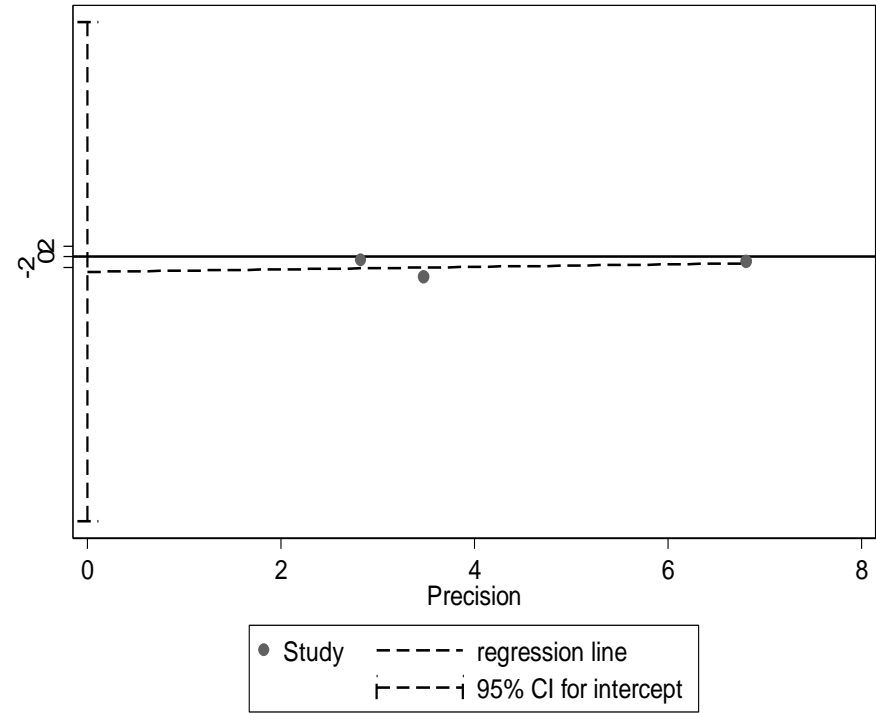

B

Supplementary Figure 5. Funnel plot(A), and Egger plot(B) for publication bias for OS in patients with high TMB versus patients with low TMB



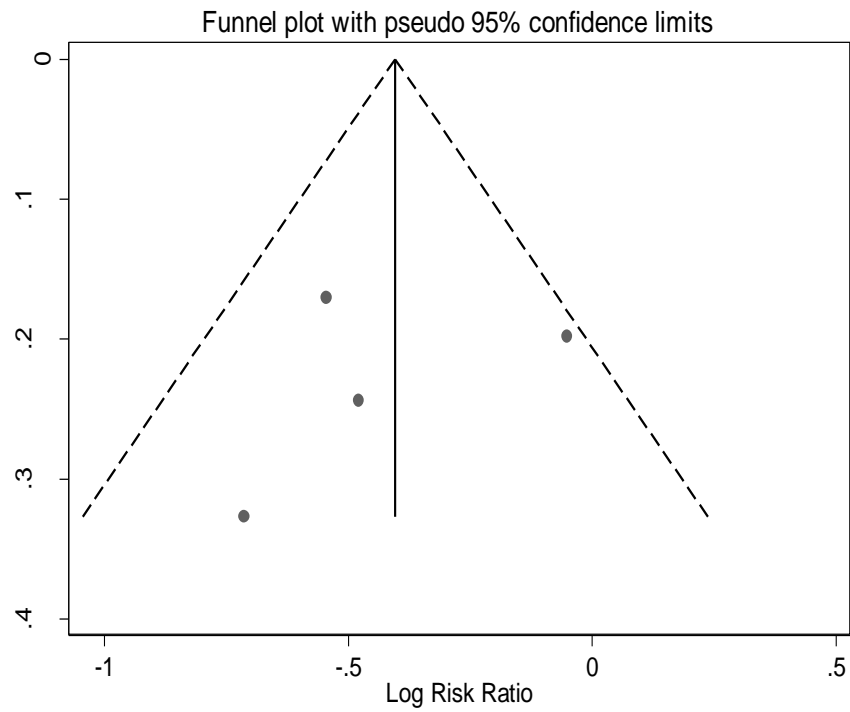

A

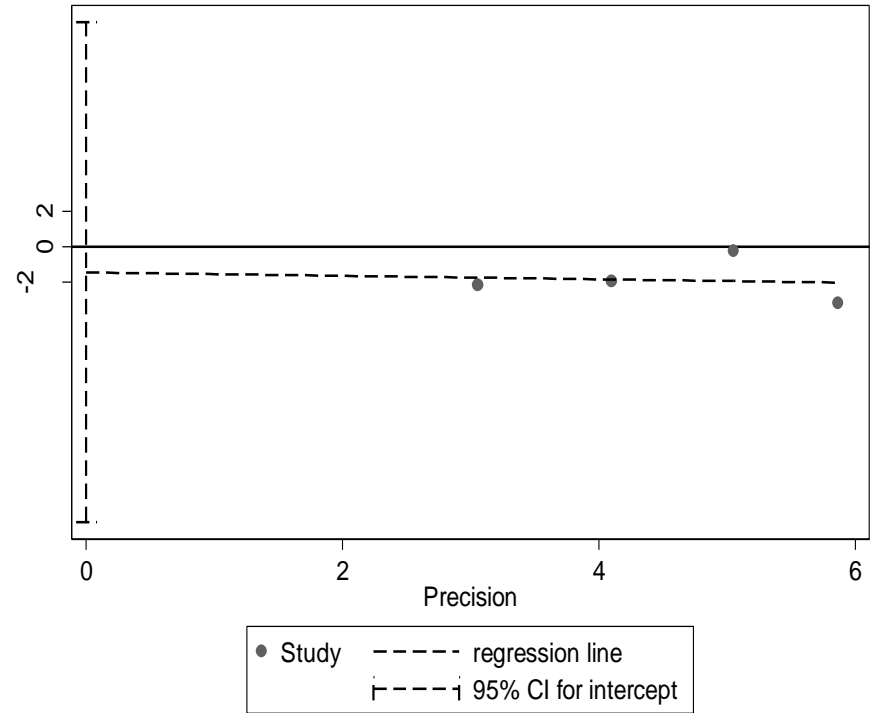

B

Supplementary Figure 6. Funnel plot(A), and Egger plot(B) for publication bias for PFS in patients with high TMB assigned to treat with immunotherapy versus chemotherapy.

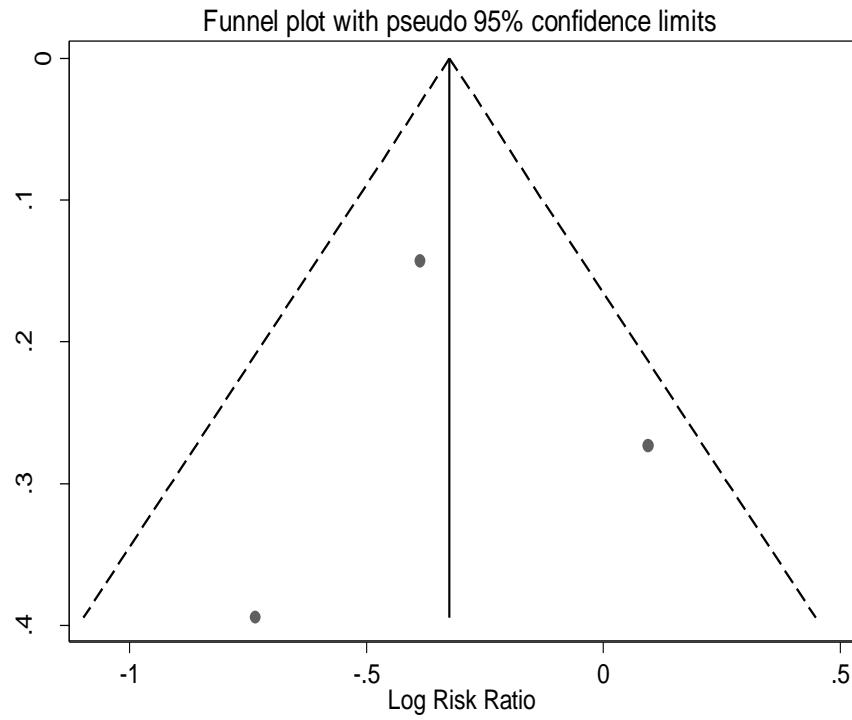

A

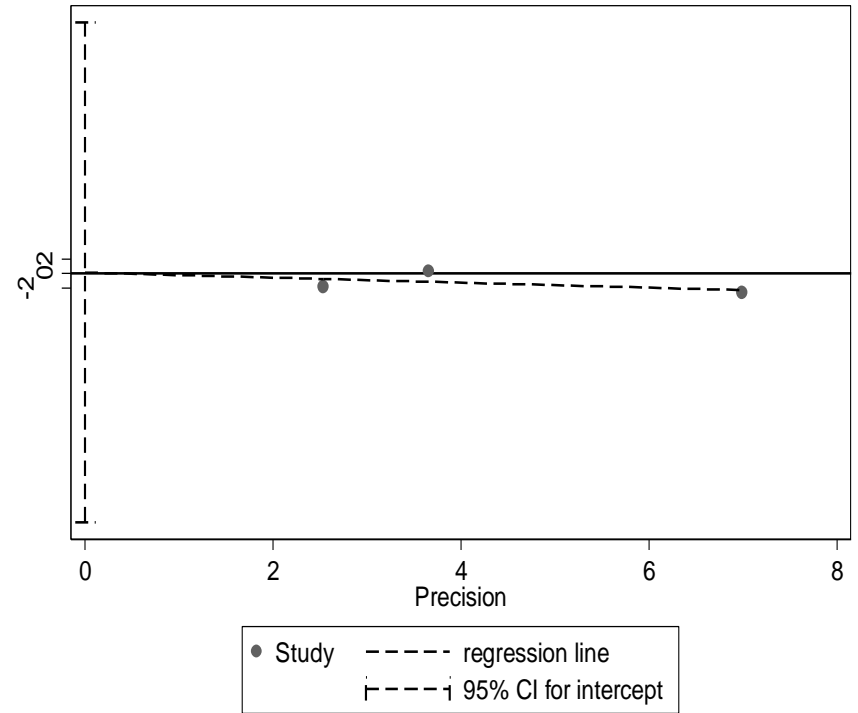

B

Supplementary Figure 7. Funnel plot (A), and Egger plot(B) for publication bias for OS in patients with high TMB assigned to treat with immunotherapy versus chemotherapy.

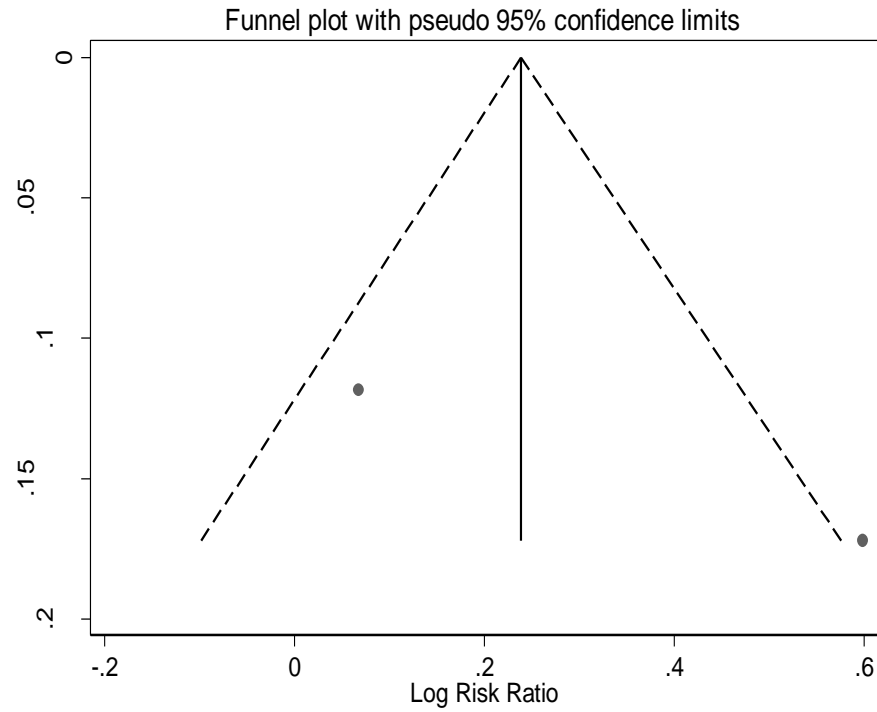

A

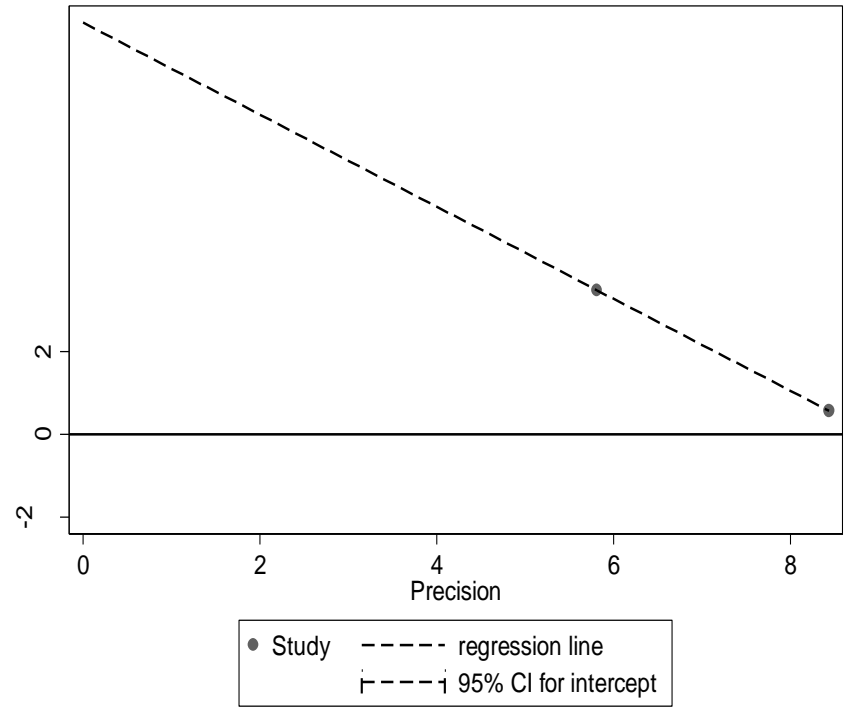

B

Supplementary Figure 8. Funnel plot (A), and Egger plot (B) for publication bias for PFS in patients with low TMB assigned to treat with immunotherapy versus chemotherapy.
